# Supplementary material for: Optineurin provides a mitophagy contact site for TBK1 activation
Source: PubMed Central journal article supplement (PMC10907724; doi:10.1038/s44318-024-00036-1), 2024-01-29
Supplement: 44318_2024_36_MOESM1_ESM.pdf [file 44318_2024_36_MOESM1_ESM.pdf]

## Appendix

Optineurin provides a mitophagy contact site for TBK1 activation.

Koji Yamano, Momoha Sawada, Reika Kikuchi, Kafu Nagataki, Waka Kojima, Ryu Endo, Hiroki Kinefuchi, Atsushi Sugihara, Tomoshige Fujino, Aiko Watanabe, Keiji Tanaka, Gosuke Hayashi, Hiroshi Murakami, Noriyuki Matsuda

| Table of Contents |                                                                        | page |
|-------------------|------------------------------------------------------------------------|------|
| Appendix Table S1 | Reagents and cell lines                                                | 2,3  |
| Appendix Table S2 | Antibodies                                                             | 4,5  |
| Appendix Table S3 | Plasmids and siRNAs                                                    | 6-8  |
| Appendix Fig S1   | Ubiquitination of autophagy adaptors upon Parkin-mediated mitophagy    | 9    |
| Appendix Fig S2   | Time course of TBK1 autophosphorylation upon Parkin-mediated mitophagy | 10   |
| Appendix Fig S3   | Kinetic parameters of the OPTN monobodies                              | 11   |

**Appendix Table S1. Reagents and cell lines**

| REAGENT or RESOURCE                              | SOURCE                   | IDENTIFIER           |
|--------------------------------------------------|--------------------------|----------------------|
| Reagents                                         |                          |                      |
| Antimycin A                                      | Sigma-Aldrich            | Cat. # A8674         |
| Oligomycin                                       | Calbiochem               | Cat. # 495455-10MGCN |
| Valinomycin                                      | Sigma-Aldrich            | Cat. # V0627         |
| Bafilomycin A1                                   | Calbiochem               | Cat. # 196000        |
| DMEM                                             | Sigma-Aldrich            | Cat. # D5796         |
| McCoy's 5A                                       | Gibco                    | Cat. # 16600-082     |
| FBS                                              | biowest                  | Cat. # S1820         |
| MEM Non-Essential Amino Acids Solution           | Gibco                    | Cat. # 11140-050     |
| Sodium Pyruvate                                  | Gibco                    | Cat. # 11360-070     |
| Penicilin-Streptomycin-Glutamine                 | Gibco                    | Cat. # 10378-016     |
| GlutaMAX Supplement                              | Gibco                    | Cat. # 35050-061     |
| Trypsin-EDTA (0.25%)                             | Gibco                    | Cat. # 25200-056     |
| FuGENE6                                          | Promega                  | Cat. # E269A         |
| Lipofectamine LTX                                | Invitrogen               | Cat. # 15338100      |
| Lipofectamine RNAiMAX                            | Invitrogen               | Cat. # 13778150      |
| CHAPS                                            | Sigma-Aldrich            | Cat. # C3023         |
| cComplete, EDTA-free Protease Inhibitor Cocktail | Roche                    | Cat. # 11873580001   |
| PhosSTOP, Phosphatase Inhibitor Cocktail         | Roche                    | Cat. # 04906845001   |
| BX-795 (TBK1 inhibitor)                          | abcam                    | Cat. # ab142016      |
| 4% PFA Solution                                  | Wako                     | Cat. # 163-20145     |
| Gelatin                                          | Sigma-Aldrich            | Cat. # G9391         |
| Triton X-100                                     | MP Biomedicals           | Cat. # 807426        |
| Tween 20                                         | nacalai tesque           | Cat. # 35624-15      |
| NuPAGE 4-12% Bis-Tris gel                        | Invitrogen               | Cat. # NP0323BOX     |
| Difco Skim Milk                                  | BD Biosciences           | Cat. # 232100        |
| Phusion High-Fidelity DNA polymerase             | Thermo Fisher Scientific | Cat. # F-530L        |
| DNA Ligation Kit                                 | TaKaRa                   | Cat. # 6023          |
| Western Lightning Plus-ECL                       | PerkinElmer              | Cat. # NEL105001EA   |
| ECL Prime Western Blotting Detection Reagents    | GE Healthcare            | Cat. # RPN2232       |
| BL21-CodonPlus(DE3)-RIL Competent Cells          | Agilent Technology       | Cat. # 230245        |

|                                                    |                         |                      |
|----------------------------------------------------|-------------------------|----------------------|
| FuGENE® HD Transfection Reagent                    | Promega                 | Cat. # E2311         |
| TCEP (Tris(2-carboxyethyl)phosphine hydrochloride) | Sigma                   | Cat. # C4706-10G     |
| Ni-NTA Agarose                                     | QIAGEN                  | Cat. # 30230         |
| Glutathione Sepharose 4B                           | cytiva                  | Cat. # 17075605      |
| PD MidiTrap™ G-25                                  | cytiva                  | Cat. # 28918008      |
| PreScission™ Protease                              | cytiva                  | Cat. # 27084301      |
| DTT (1,4-dithiothreitol)                           | Roche                   | Cat. # 10708984001   |
| Imidazole                                          | FUJIFILM                | Cat. # 095-00015     |
| L-Glutathione reduced                              | Sigma                   | Cat. # G4251-25G     |
| GFP-Trap Agarose                                   | ChromoTek GmbH          | Cat. # gta-20        |
| Epoxomicin                                         | PEPTIDE INSTITUTE, INC. | Cat. # 4381-v        |
| Z-Leu-Leu-Leu-H (aldehyde) MG-132                  | PEPTIDE INSTITUTE, INC. | Cat. # 3175-v        |
| Concanamycin A                                     | Adipogen Life Sciences  | Cat. # BVT-0237-C100 |
| Recombinant human His6 USP2 catalytic domain       | BostonBiochem           | Cat. # E-506         |
| Cell lines                                         |                         |                      |
| WT HeLa                                            | ATCC                    | CCL-2,2              |
| HeLa AAVS-Parkin                                   | This study              |                      |
| <i>FIP200</i> KO HeLa                              | (Vargas et al., 2019)   |                      |
| <i>ATG5</i> KO HeLa                                | (Nezich et al., 2015)   |                      |
| <i>ATG9A</i> KO HeLa                               | (Nezich et al., 2015)   |                      |
| Penta (OPTN/NDP52/TAX1BP1/p62/NBR1) KO HeLa        | (Lazarou et al., 2015)  |                      |
| <i>TBK1</i> KO HeLa                                | This study              |                      |
| <i>FIP200/TBK1</i> DKO HeLa                        | This study              |                      |
| <i>ATG9A/TBK1</i> DKO HeLa                         | This study              |                      |
| HEK293T                                            | ATCC                    | CRL-3216             |
| HCT116                                             | (Yamano et al., 2018)   |                      |
| <i>TBK1</i> <sup>-/-</sup> HCT116                  | (Yamano et al., 2020)   |                      |

**Appendix Table S2. Antibodies**

| REAGENT or RESOURCE                                      | SOURCE         | IDENTIFIER                         |
|----------------------------------------------------------|----------------|------------------------------------|
| Antibodies for immunoblotting                            |                |                                    |
| Rabbit monoclonal anti-NAK/TBK1 (EP611Y)                 | abcam          | Cat. # ab40676, RRID:AB_776632     |
| Mouse monoclonal anti- $\beta$ -Actin (6D1)              | MBL            | Cat. # M177-3, RRID:AB_10697039    |
| Rabbit polyclonal anti-TOMM20                            | Proteintech    | Cat. # 11802-1-AP, RRID:AB_2207530 |
| Rabbit monoclonal anti-NDP52 (D1E4A)                     | Cell Signaling | Cat. # 60732, RRID:AB_2732810      |
| Rabbit monoclonal anti-APG5L/ATG5 (EPR1755(2))           | abcam          | Cat. # ab108327, RRID:AB_2650499   |
| Mouse monoclonal anti-DDDDK (FLA-1)                      | MBL            | Cat. # M185-3L, RRID:AB_11123930   |
| Rabbit polyclonal anti-LC3B                              | Sigma-Aldrich  | Cat. # L7543, RRID:AB_796155       |
| Rabbit polyclonal anti-SQSTM1/p62                        | MBL            | Cat. # PM045, RRID:AB_1279301      |
| Rabbit monoclonal anti-Phospho-SQSTM1/p62 (S403) (D8D6T) | Cell Signaling | Cat. # 39786, RRID:AB_2799162      |
| Mouse monoclonal anti-NBR1 (4BR)                         | Santa Cruz     | Cat. # sc-130380, RRID:AB_2149402  |
| Rabbit monoclonal anti-TAX1BP1 (D1D5)                    | Cell Signaling | Cat. # 5105S, RRID:AB_11178939     |
| Mouse monoclonal anti-Multi Ubiquitin (FK2)              | MBL            | Cat. # D058-3, RRID:AB_592937      |
| Rabbit polyclonal anti-AZI2/NAP1                         | Proteintech    | Cat. # 15042-1-AP, RRID:AB_2878103 |
| Rabbit monoclonal anti-SINTBAD/TBKBP1 (D1A5)             | Cell Signaling | Cat. # 8605S, RRID:AB_10839270     |
| Rabbit polyclonal anti-GFP                               | abcam          | Cat. # ab6556, RRID:AB_305564      |
| Rabbit monoclonal anti-Phospho TBK1 (S172) (D52C2)       | Cell Signaling | Cat. # 5483, RRID:AB_10693472      |
| Rabbit monoclonal anti-ATG9A (EPR2450(2))                | abcam          | Cat. # ab108338, RRID:AB_10863880  |
| Rabbit monoclonal anti-FIP200 (D10D11)                   | Cell Signaling | Cat. # 12436S, RRID:AB_2797913     |
| Rabbit polyclonal anti-OPTN                              | Proteintech    | Cat. # 10837-1-AP, RRID:AB_2156665 |
| Rabbit monoclonal anti-Phospho-OPTN (S177)               | Cell Signaling | Cat. # 57548S, RRID:AB_2799529     |
| Anti-Mouse IgG horseradish peroxidase-linked             | Promega        | Cat. # W402B, RRID:AB_430834       |
| Anti-Rabbit IgG horseradish peroxidase-linked            | Promega        | Cat. # W401B, RRID:AB_430833       |
| Antibodies for immunostaining                            |                |                                    |
| Mouse monoclonal anti-TOMM20 (F-10)                      | Santa Cruz     | Cat. # sc-17764, RRID:AB_628381    |
| Rabbit polyclonal anti-OPTN                              | Proteintech    | Cat. # 10837-1-AP, RRID:AB_2156665 |
| Rabbit polyclonal anti-NDP52                             | abcam          | Cat. # ab68588, RRID:AB_1640255    |
| Mouse monoclonal anti-DDDDK (FLA-1)                      | MBL            | Cat. # M185-3L, RRID:AB_11123930   |

|                                                     |                          |                                          |
|-----------------------------------------------------|--------------------------|------------------------------------------|
| Rabbit polyclonal anti-TOMM20                       | Proteintech              | Cat. # 11802-1-AP, RRID:AB_2207530       |
| Guinea pig polyclonal anti-p62                      | MBL                      | Cat. # PM066, RRID:AB_10952738           |
| Rabbit polyclonal anti-SQSTM1/p62                   | MBL                      | Cat. # PM045, RRID:AB_1279301            |
| Mouse monoclonal anti-Multi Ubiquitin (FK2)         | MBL                      | Cat. # D058-3, RRID:AB_592937            |
| Rabbit monoclonal anti-Phospho TBK1 (S172) (D52C2)  | Cell Signaling           | Cat. # 5483, RRID:AB_10693472            |
| Rabbit monoclonal anti-TAX1BP1 (D1D5)               | Cell Signaling           | Cat. # 5105S, RRID:AB_11178939           |
| Mouse monoclonal anti-NBR1 (4BR)                    | Santa Cruz               | Cat. # sc-130380, RRID:AB_2149402        |
| Rabbit polyclonal anti-Ferritin                     | Rockland                 | Cat. # 200-401-090-0100, RRID:AB_2612112 |
| Rabbit monoclonal anti-Phospho-OPTN (S177)          | Cell Signaling           | Cat. # 57548S, RRID:AB_2799529           |
| Rat monoclonal anti-HA (3F10)                       | Roche                    | Cat. # 11867423001, RRID:AB_390918       |
| Rabbit polyclonal anti-NBR1                         | Gift from Komatsu        |                                          |
| Rabbit polyclonal anti-WIPI2                        | Sigma-Aldrich            | Cat. # SAB4200400                        |
| Goat polyclonal anti-HSP60 (N-20)                   | Santa Cruz               | Cat. # sc-1052, RRID:AB_631683           |
| Goat anti-Rabbit IgG Alexa Fluor 488 conjugated     | Invitrogen               | Cat. # A-11034, RRID:AB_2576217          |
| Goat anti-Rabbit IgG Alexa Fluor 568 conjugated     | Invitrogen               | Cat. # A-11036, RRID:AB_10563566         |
| Goat anti-Rabbit IgG Alexa Fluor 647 conjugated     | Invitrogen               | Cat. # A-21245, RRID:AB_2535813          |
| Goat anti-Mouse IgG Alexa Fluor 488 conjugated      | Invitrogen               | Cat. # A-11029, RRID:AB_2534088          |
| Goat anti-Mouse IgG Alexa Fluor 568 conjugated      | Invitrogen               | Cat. # A-11031, RRID:AB_144696           |
| Goat anti-Mouse IgG Alexa Fluor 647 conjugated      | Invitrogen               | Cat. # A-21236, RRID:AB_2535805          |
| Goat anti-Rat IgG Alexa Fluor 647 conjugated        | Invitrogen               | Cat. # A-21247, RRID:AB_141778           |
| Goat anti-Guinea pig IgG Alexa Fluor 647 conjugated | Invitrogen               | Cat. # A-21450, RRID:AB_141882           |
| Donkey anti-Goat igG Alexa Fluor 647 conjugated     | Thermo Fisher Scientific | Cat. # A-21447, RRID:AB_2535864          |

**Appendix Table S3. Plasmids and siRNAs**

| REAGENT or RESOURCE                     | SOURCE                 |
|-----------------------------------------|------------------------|
| Plasmid DNA                             |                        |
| pcDNA3.1(+)                             | Invitrogen (V79020)    |
| pMXs-puro_YFP                           | Yamano et al., 2020    |
| pMXs-puro_3FLAG-OPTN                    | Yamano et al., 2020    |
| pBABE-puro_3FLAG-OPTN                   | This study             |
| pMXs-puro_3FLAG-NDP52                   | Yamano et al., 2020    |
| pBABE-puro_3FLAG-NDP52                  | This study             |
| pMXs-puro_3FLAG-OPTN(4LA)               | Yamano et al., 2020    |
| pMXs-puro_3FLAG-OPTN(F178A)             | Yamano et al., 2020    |
| pMXs-puro_3FLAG-OPTN(4LA, F178A)        | Yamano et al., 2020    |
| pBMNz/mEGFP-Optineurin                  | Lazarou et al. 2015    |
| pMXs-puro_pSu9-mCherry-3FLAG            | This study             |
| pMXs-puro_3HA-WIP1                      | This study             |
| pBMNz-YFP-Parkin                        | Lazarou et al., 2015   |
| pRetroQ-mt-Keima                        | Gift from Chunxin Wang |
| pBABE-puro_Untag-Parkin                 | Yamano et al., 2020    |
| pZDonor-AAVS1-Puro-EF1p-untag-Parkin    | This study             |
| phAG_OPTN(S473E)                        | Yamano et al., 2020    |
| phAG_OPTN(M44Q/L54Q, S473E)             | Yamano et al., 2020    |
| pHA-Ash_6Ub                             | Yamano et al., 2020    |
| pUMVC (Gag-Pol)                         | Gift from Chunxin Wang |
| pCMV-VSV-G (VSV-G)                      | Gift from Chunxin Wang |
| pMXs-puro_EYFP-P2A-EcoRI                | This study             |
| pMXs-puro_EYFP-P2A-hOpt_TBK1 WT         | This study             |
| pMXs-puro_EYFP-P2A-hOpt_TBK1 R47H       | This study             |
| pMXs-puro_EYFP-P2A-hOpt_TBK1 D135N      | This study             |
| pMXs-puro_EYFP-P2A-hOpt_TBK1 S172A      | This study             |
| pMXs-puro_EYFP-P2A-hOpt_TBK1 G217R      | This study             |
| pMXs-puro_EYFP-P2A-hOpt_TBK1 R357Q      | This study             |
| pMXs-puro_EYFP-P2A-hOpt_TBK1 M559R      | This study             |
| pMXs-puroYFP-TEV-OPTN monobody clone #1 | This study             |

|                                            |            |
|--------------------------------------------|------------|
| pMXs-puroYFP-TEV-OPTN monobody clone #2    | This study |
| pMXs-puroYFP-TEV-OPTN monobody clone #3    | This study |
| pMXs-puroYFP-TEV-OPTN monobody clone #4    | This study |
| pMXs-puroYFP-TEV-OPTN monobody clone #5    | This study |
| pMXs-puroYFP-TEV-OPTN monobody clone #6    | This study |
| pMXs-puroYFP-TEV-OPTN monobody clone #7    | This study |
| pMXs-puroYFP-TEV-OPTN monobody clone #8    | This study |
| pMXs-puroYFP-TEV-OPTN monobody clone #9    | This study |
| pMXs-puroYFP-TEV-OPTN monobody clone #10   | This study |
| pMXs-puroYFP-TEV-OPTN monobody clone #11   | This study |
| pMXs-puroYFP-TEV-OPTN monobody clone #12   | This study |
| pET21a(+)_OPTN monobody clone #2           | This study |
| pET21a(+)_OPTN monobody clone #3           | This study |
| pET21a(+)_OPTN monobody clone #4           | This study |
| pET21a(+)_OPTN monobody clone #5           | This study |
| pET21a(+)_OPTN monobody clone #6           | This study |
| pET21a(+)_OPTN monobody clone #7           | This study |
| pET21a(+)_OPTN monobody clone #8           | This study |
| pET21a(+)_OPTN monobody clone #9           | This study |
| pET16b_OPTN monobody clone #2              | This study |
| pET16b_OPTN monobody clone #3              | This study |
| pET16b_OPTN monobody clone #4              | This study |
| pET16b_OPTN monobody clone #5              | This study |
| pET16b_OPTN monobody clone #6              | This study |
| pET16b_OPTN monobody clone #7              | This study |
| pET16b_OPTN monobody clone #8              | This study |
| pET16b_OPTN monobody clone #9              | This study |
| pGEX6P1_Opt_TBK1(677-729aa)                | This study |
| pET16b_His10-Ndel-EGFP                     | This study |
| pET16b_His10-Opt_OPTN(26-196aa, E50K)-EGFP | This study |
| pMXs-puro_EGFP-TEV-OPTN Monobody #3        | This study |
| pMXs-puro_EGFP-TEV-OPTN Monobody #4        | This study |
| pGEX6P1_Opt_OPTN(26-119aa)-sortase-His6    | This study |
| pGEX6P1_Opt_OPTN(26-196aa)-sortase-His6    | This study |

|                                               |                          |
|-----------------------------------------------|--------------------------|
| pGEX6P1_Opt_OPTN(133-196aa)-sortase-His6      | This study               |
| Oligonucleotides                              |                          |
| siRNA FIP200 #94 (GCCUAGAACAACUACGAAtt)       | Thermo Fisher Scientific |
| siRNA FIP200 #95 (GUCGUCUCCUAAUCCUUAUAtt)     | Thermo Fisher Scientific |
| siRNA ATG9A #05 (CCACAAACGUGAGCUGACAtt)       | Thermo Fisher Scientific |
| siRNA ATG9A #06 (GAAUAUGCAUCCACAGAGAtt)       | Thermo Fisher Scientific |
| siRNA OPTN #s19719 (GGAGACUGUUGGAAGCGAAtt)    | Thermo Fisher Scientific |
| siRNA NDP52 #s19996 (CCUUCAUGUGGGUUACUUUtt)   | Thermo Fisher Scientific |
| siRNA TAX1BP1 #s16986 (CUGAUACACUGGAACACGAtt) | Thermo Fisher Scientific |
| siRNA p62 #8878 (GAUCUGCGAUGGCUGCAAU)         | Dharmacon                |
| siRNA NBR1 #4077 (GGAGUGGAUUUACCAGUUA)        | Dharmacon                |



## Appendix Figure S1

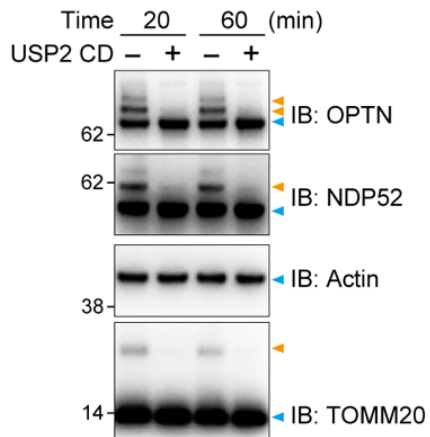

### Appendix Figure S1. Ubiquitination of autophagy adaptors upon Parkin-mediated mitophagy

Parkin-expressing HeLa cells were treated with valinomycin in the presence of bafilomycin for 1 hr. The cells solubilized with 2% CHAPS were incubated with or without recombinant USP2 catalytic domain (USP2-CD) for 20 or 60 min and analyzed by immunoblotting. The light blue and orange arrowheads indicate unmodified and ubiquitinated protein bands, respectively.

## Appendix Figure S2

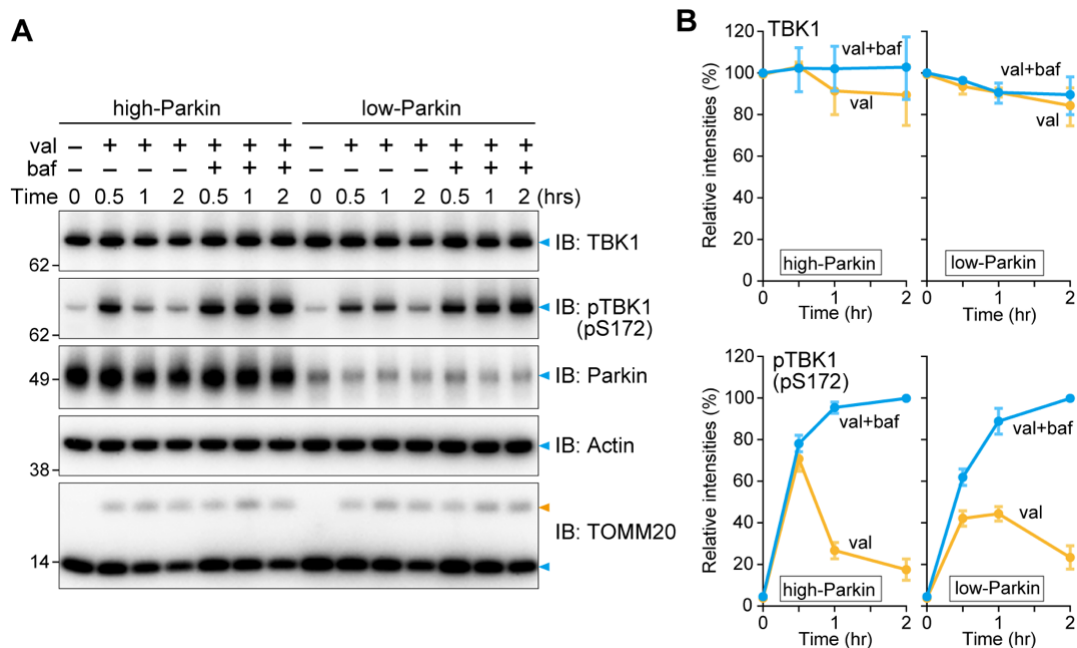

### Appendix Figure S2. Time course of TBK1 autophosphorylation upon Parkin-mediated mitophagy

**A** High-Parkin denotes HeLa cells with the *PARKIN* gene integrated in the AAVS-locus under the CMV promoter, whereas low-Parkin denotes HeLa cells stably expressing Parkin following retrovirus infection (See Materials and Methods for details). Both groups of cells were treated with valinomycin (val) and bafilomycin (baf) for the indicated times. Total cell lysates were analyzed by immunoblotting (IB). The light blue and orange arrowheads indicate unmodified and ubiquitinated protein bands, respectively.

**B** The levels of proteins indicated in (A) were quantified. TBK levels without val treatment were set to 100. pTBK1(pS172) levels after 2 hrs of val and baf treatment were set to 100. Error bars represent mean  $\pm$  s.d. of three independent experiments.

### Appendix Figure S3

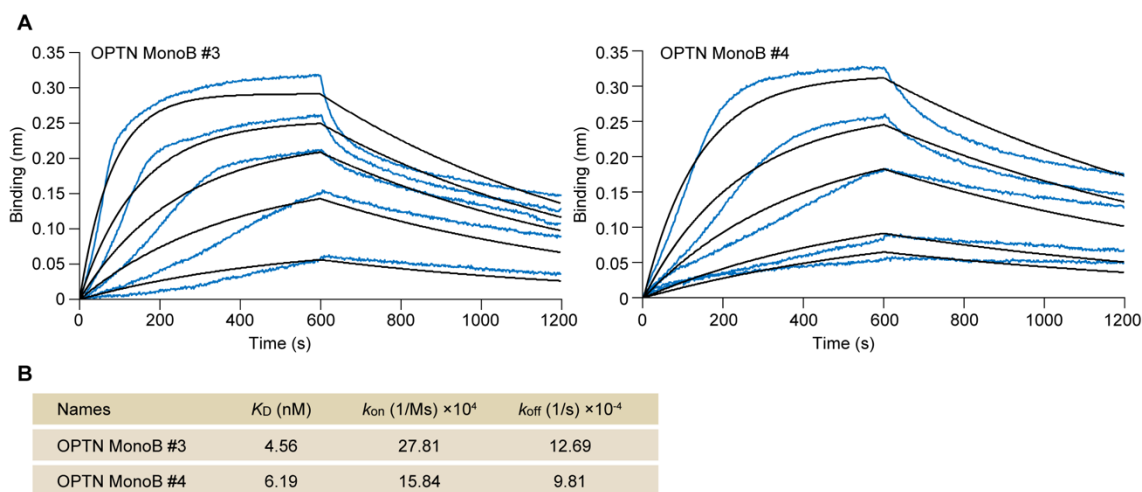

### Appendix Figure S3. Kinetic parameters of the OPTN monobodies

**A** Kinetic parameters for the OPTN monobodies were determined by Bio-layer interferometry. A biotin-labeled OPTN (26-196 aa) was immobilized on a sensor chip and various concentrations (40, 20, 10, 5, and 2.2 nM) of monobodies (MonoB) #3 and #4 were used for the kinetic analyses. Experimental data are shown in blue and the 1:1 binding model is shown in black.

**B** Kinetic parameters of the OPTN monobodies.

### References

- Lazarou M, Sliter DA, Kane LA, Sarraf SA, Wang C, Burman JL, Sideris DP, Fogel AI, Youle RJ (2015) The ubiquitin kinase PINK1 recruits autophagy receptors to induce mitophagy. *Nature* 524: 309-314
- Nezich CL, Wang C, Fogel AI, Youle RJ (2015) MiT/TFE transcription factors are activated during mitophagy downstream of Parkin and Atg5. *The Journal of cell biology* 210: 435-450
- Vargas JNS, Wang C, Bunker E, Hao L, Maric D, Schiavo G, Randow F, Youle RJ (2019) Spatiotemporal Control of ULK1 Activation by NDP52 and TBK1 during Selective Autophagy. *Molecular cell* 74: 347-362 e346
- Yamano K, Wang C, Sarraf SA, Munch C, Kikuchi R, Noda NN, Hizukuri Y, Kanemaki MT, Harper W, Tanaka K *et al* (2018) Endosomal Rab cycles regulate Parkin-mediated mitophagy. *eLife* 7: e31326
- Yamano K, Kikuchi R, Kojima W, Hayashida R, Koyano F, Kawawaki J, Shoda T, Demizu M, Tanaka K *et al* (2020) Critical role of mitochondrial ubiquitination and the OPTN-ATG9A axis in mitophagy. *The Journal of cell biology* 219: e201912144
